# Supplementary material
Source: PubMed Central journal article supplement (PMC2947161)
Supplement: tpc.110.075549_1.pdf [file tpc.110.075549_1.pdf]

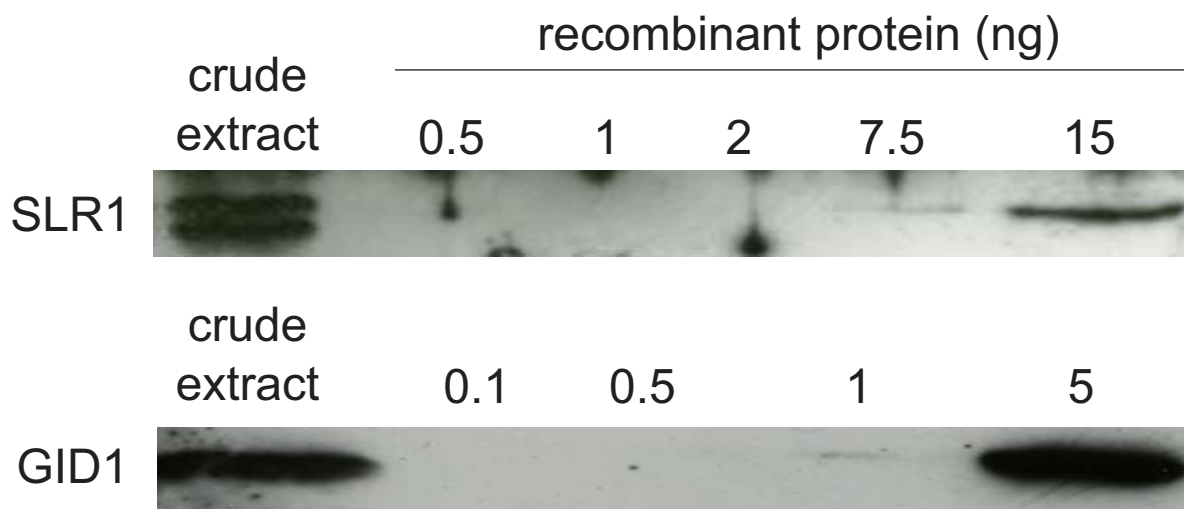

**Supplemental Figure 1.** Amount of SLR1 and GID1 protein in rice cells. Identical amount of crude protein extract from Taichung 65 rice was subject to immunoblot analyses using an anti-SLR1 antibody (top panel, leftmost lane) or anti-GID1 antibody (bottom panel, leftmost lane), respectively. Immunoblot analyses of recombinant SLR1 or GID1 proteins expressed in *E. coli* were used to estimate the amount of endogenous SLR1 and GID1 protein level. Note that amount of SLR1 protein is more abundant (> 15 ng) than GID1 (< 5 ng) in rice cells.



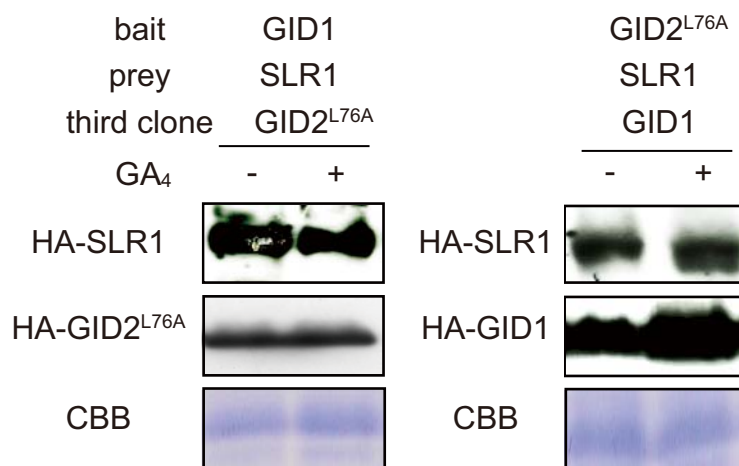

**Supplemental Figure 3.** Mutation in the F-box Domain of GID2 Abolishes the GA-, GID1-, and GID2-dependent Degradation of SLR1.

Accumulation of AD-HA-SLR1, HA-GID2<sup>L76A</sup>, and HA-GID1 protein in yeast cells. Crude protein extracts from yeast grown in the absence or presence of 10<sup>-4</sup> M GA<sub>4</sub> were subject to immunoblot analysis and detected using HA antibody for HA-SLR1 and HA-GID2<sup>L76A</sup>, and anti-GID1 antibody for HA-GID1. The loading control of Coomassie Brilliant Blue (CBB) staining is shown in the bottom panels.

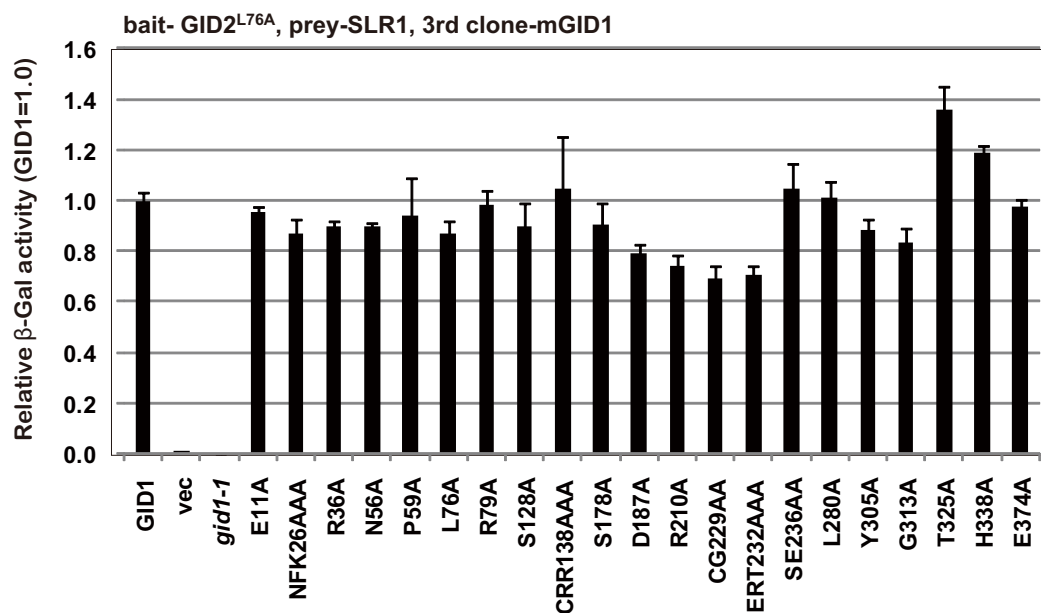

**Supplemental Figure 4.** Effect of GID1 Amino Acid Substitutions on SLR1-GID2 Interaction in Yeast.

Y3H assay using  $GID2^{L76A}$  as bait, SLR1 as prey, and alanine-mutated GID1 proteins (mGID1s) as third clones with  $10^{-4}$  M GA<sub>4</sub>. mGID1s previously shown to interact with SLR1 in the Y2H liquid assay (Ueguchi-Tanaka et al., 2007) were used as third clones (means  $\pm$  SD; n = 3). GID1 and *gid1-1* mutant protein used as a positive and negative control, respectively. Interacting activities are shown as relative rates, with activity of SLR1-GID2 in the presence of wild-type GID1 set 1.

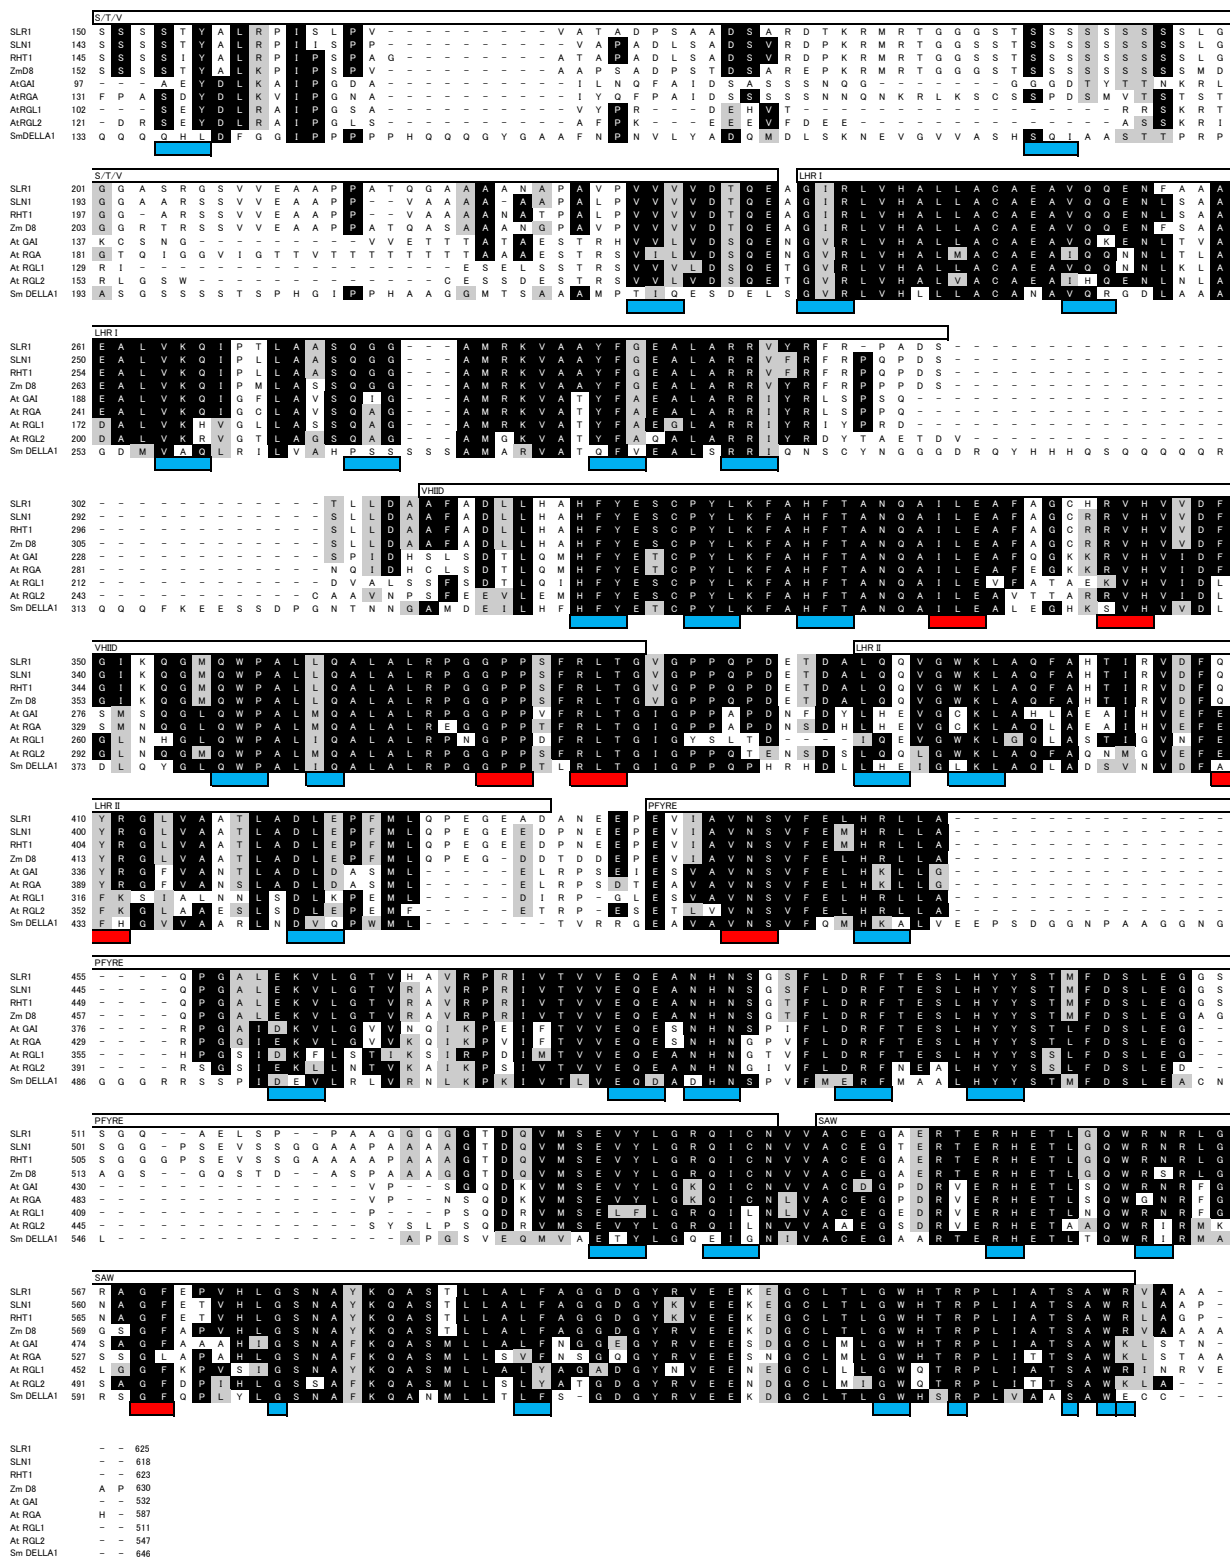

**Supplemental Figure 5.** Comparison of amino acid sequences of vascular plant DELLA proteins. Sequences have been aligned from the poly S/T/V domain to the end of each protein. Amino acids that were subject to alanine scanning are shown in blue boxes at the bottom of the alignment. Red boxes indicate sites that could not be expressed in yeast when mutated and were not studied further. Black and grey indicate identical and similar amino acids, respectively. Zm, *Zea mays*; At, *Arabidopsis thaliana*; Sm, *Selaginella moellendorffii*.

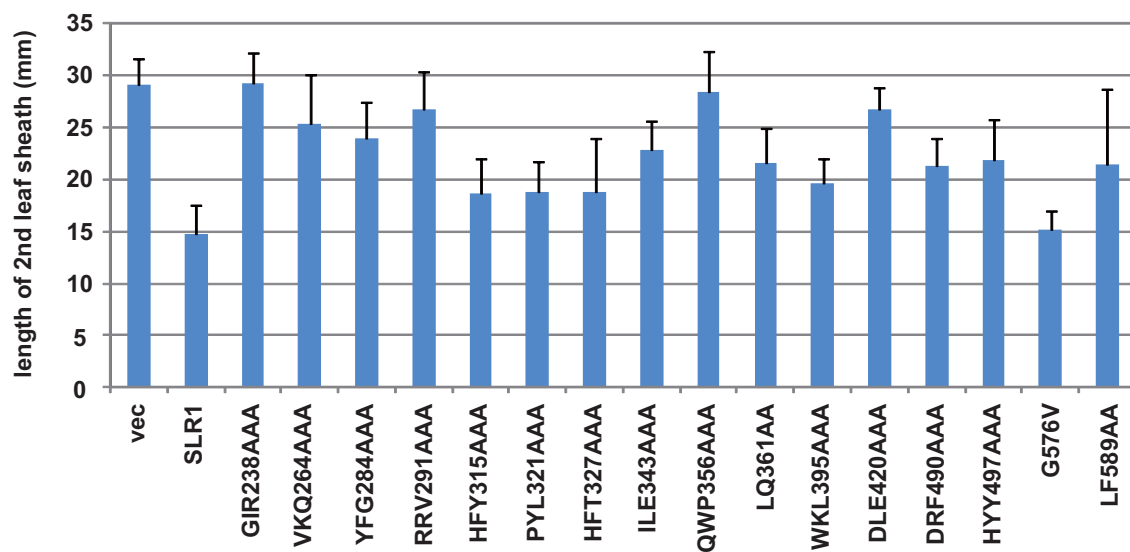

**Supplemental Figure 6.** Comparison of second leaf sheath length of transgenic seedlings grown under GA-deficient conditions. Seedlings were grown in the presence of  $10^{-6}$  M uniconazole. Wild-type and mSLR1s fused with FLAG tag were overproduced in wild-type T65 rice. vec, T65 transformed with *proAct*-FLAG/pCAMBIA control vector. The measurements are the means  $\pm$  SE (n = 10 to 17).

**Supplemental Table 1.** Primers used in this study

| Primer                                                                                                                                                                                                                               | Sequence (5' to 3')             | Note                                                                                                              |
|--------------------------------------------------------------------------------------------------------------------------------------------------------------------------------------------------------------------------------------|---------------------------------|-------------------------------------------------------------------------------------------------------------------|
| <b>Y2H &amp; Y3H experiment/ amplifying DNA fragments for cloning into pGADT7 vector</b>                                                                                                                                             |                                 |                                                                                                                   |
| pGADT7.slr1-d4.F                                                                                                                                                                                                                     | GGAATTCATATGAAGCGCAGTACCAAGA    | 5' primer amplifying <i>slr1-d4</i> with <i>Nde</i> I site                                                        |
| pGADT7.slr1-d4.R                                                                                                                                                                                                                     | GCAAGCTTGAATTCCTAGTAGTAGAGGTTAG | 3' primer amplifying <i>slr1-d4</i> with <i>Eco</i> RI site                                                       |
| pGADT7.SLR1 (E4-R125).F                                                                                                                                                                                                              | GGAATTCGAGTACCAAGAAGCCGGCCG     | 5' primer amplifying <i>SLR1 (E4-R125)</i> with <i>Eco</i> RI site                                                |
| pGADT7.SLR1 (E4-R125).R                                                                                                                                                                                                              | TCCCCCGGGCGGGCAGCCGGCGGCGCTG    | 3' primer amplifying <i>SLR1 (E4-R125)</i> with <i>Sma</i> I site                                                 |
| pGADT7.GID1.F                                                                                                                                                                                                                        | GGAATTCATGCGCCGAGCGACGAGGT      | 5' primer amplifying <i>GID1</i> with <i>Eco</i> RI site                                                          |
| pGADT7.GID1.R                                                                                                                                                                                                                        | GGAATTCCTAGTAGTAGAGGTTAGCGT     | 3' primer amplifying <i>GID1</i> with <i>Eco</i> RI site                                                          |
| <b>Y2H &amp; Y3H experiments/ amplifying DNA fragments for cloning into pBRIDGE vector</b>                                                                                                                                           |                                 |                                                                                                                   |
| pBr BD-GID2.F                                                                                                                                                                                                                        | GGAATTCATGAAGTTCCTGCTGATTC      | 5' primer amplifying <i>GID2</i> with <i>Eco</i> RI site                                                          |
| pBr BD-GID2.R                                                                                                                                                                                                                        | CGGGATCCCTACCCGATTGGCCCCCTC     | 3' primer amplifying <i>GID2</i> with <i>Bam</i> HI site                                                          |
| pBr BD-GID2 3 <sup>rd</sup> -GID1.F                                                                                                                                                                                                  | GGAATTCATGGCCGGCAGCGACGAGGT     | 5' primer amplifying <i>GID1</i> with <i>Bgl</i> II site                                                          |
| pBr BD-GID2 3 <sup>rd</sup> -GID1.R                                                                                                                                                                                                  | CGGGATCCCTAGTAGTAGAGGTTAGCGT    | 3' primer amplifying <i>GID1</i> with <i>Bgl</i> II site                                                          |
| pBr BD-GID1.F                                                                                                                                                                                                                        | GGAATTCATGGCCGGCAGCGACGAG       | 5' primer amplifying <i>GID1</i> with <i>Eco</i> RI site                                                          |
| pBr BD-GID1.R                                                                                                                                                                                                                        | CGGGATCCCTAGTAGTAGAGGTTAGC      | 3' primer amplifying <i>GID1</i> with <i>Bam</i> HI site                                                          |
| pBr BD-GID1 3 <sup>rd</sup> -GID2.F                                                                                                                                                                                                  | GAAGATCTATGAAGTTCCTGCTGATTC     | 5' primer amplifying <i>GID2</i> or <i>GID2<sup>L76A</sup></i> with <i>Bgl</i> II site                            |
| pBr BD-GID1 3 <sup>rd</sup> -GID2.R                                                                                                                                                                                                  | GAAGATCTCTACCCGATTGGCCCCCTC     | 3' primer amplifying <i>GID2</i> or <i>GID2<sup>L76A</sup></i> with <i>Bgl</i> II site                            |
| pBr BD-GID2 <sup>L76A</sup> .F                                                                                                                                                                                                       | GGAATTCATGAAGTTCCTGCTGATTC      | 3' primer amplifying <i>GID2<sup>L76A</sup></i> with <i>Eco</i> RI site                                           |
| pBr BD-GID2 <sup>L76A</sup> .R                                                                                                                                                                                                       | TCCCCCGGGCTACCCGATTGGCCCCCTC    | 3' primer amplifying <i>GID2<sup>L76A</sup></i> with <i>Sma</i> I site                                            |
| pBr BD-GID2 (E114-P193) 3rd-GID1.F                                                                                                                                                                                                   | GGAATTCGAGGCGCGTGCCTGCGGGA      | 3' primer amplifying <i>GID2 (E114-P193)</i> with <i>Eco</i> RI site                                              |
| pBr BD-GID2 (E123-P193) 3rd-GID1.F                                                                                                                                                                                                   | GGAATTCACCTCCGCTTCTCCGAGCG      | 3' primer amplifying PpGID1L2 with <i>Eco</i> RI site                                                             |
| pBr BD-GID2 (E114-P193) 3rd-GID1.R                                                                                                                                                                                                   | TCCCCCGGGAGGCATATTCTGAAAGAACC   | 3' primer amplifying <i>GID2 (E114-P193)</i> or <i>GID2 (E123-P193)</i> with <i>Sma</i> I site                    |
| pBr BD-GID2 <sup>L76A</sup> 3 <sup>rd</sup> -mGID1s.F                                                                                                                                                                                | TCCCCCGGGAATGGCCGGCAGCGACGAGGT  | 3' primer amplifying <i>mGID1s</i> with <i>Sma</i> I site                                                         |
| pBr BD-GID2 <sup>L76A</sup> 3 <sup>rd</sup> -mGID1s.R                                                                                                                                                                                | TCCCCCGGGCTAGTAGTAGAGGTTAGCGT   | 3' primer amplifying <i>mGID1s</i> with <i>Sma</i> I site                                                         |
| <b>Production of GST-SLR1, its mutant proteins (GST-mSLR1s), and GST-SLR1 (E4-R125)/amplifying various forms of SLR1 for cloning into pGEX-6P-1 vector, and amplifying various forms of GST-SLR1s for cloning into pEU101 vector</b> |                                 |                                                                                                                   |
| pGEX6P.SLR1.F                                                                                                                                                                                                                        | GGAATTCATGAAGCGCAGTACCAAGA      | 5' primer amplifying <i>SLR1</i> or <i>mSLR1s</i> with <i>Eco</i> RI site                                         |
| pGEX6P.SLR1.R                                                                                                                                                                                                                        | TCCCCCGGGTACGCGCGCGCAGCGCC      | 3' primer amplifying <i>SLR1</i> or <i>mSLR1s</i> with <i>Sma</i> I site                                          |
| pGEX6P.SLR1 (E4-R125).F                                                                                                                                                                                                              | GGAATTCGAGTACCAAGAAGCCGGCCG     | 5' primer amplifying <i>SLR1 (E4-R125)</i> with <i>Eco</i> RI site                                                |
| pGEX6P.SLR1 (E4-R125).R                                                                                                                                                                                                              | TCCCCCGGGCGGGCAGCCGGCGGCGCTG    | 3' primer amplifying <i>SLR1 (E4-R125)</i> with <i>Sma</i> I site                                                 |
| pEU101.GST-SLR1.F                                                                                                                                                                                                                    | GCCGATATCATGTTCCCTATACTAGGTT    | 5' primer amplifying <i>GST-SLR1</i> or <i>GST-mSLR1s</i> , and <i>GST-SLR1 (E4-R125)</i> with <i>Eco</i> RV site |
| pEU101.GST-SLR1.R                                                                                                                                                                                                                    | TCCCCCGGGTACGCGCGCGCAGCGCC      | 3' primer amplifying <i>GST-SLR1</i> or <i>GST-HYY497AAA SLR1</i> with <i>Sma</i> I site                          |
| pEU101.GST-mSLR1.R                                                                                                                                                                                                                   | GGGGTACCTCAGCCCGCGGCGACGCGCC    | 3' primer amplifying <i>GST-mSLR1s</i> (except for <i>GST-HYY497AAA SLR1</i> ) with <i>Kpn</i> I site             |
| pEU101.GST-SLR1 (4E-R125).R                                                                                                                                                                                                          | TCCCCCGGGTACGCGCGCGCAGCGCC      | 3' primer amplifying <i>SLR1 (4E-R125)</i> with <i>Sma</i> I site                                                 |
| <b>Transgenic experiment/ amplifying SLR1 and mSLR1s for cloning into pAct3XFLAG/pCAMBIA vector</b>                                                                                                                                  |                                 |                                                                                                                   |
| pCAMBI.pAct-3XFLAG-SLR1.F                                                                                                                                                                                                            | TCCCCCGGGATGAAGCGCAGTACCAAGA    | 5' primer amplifying <i>SLR1</i> or <i>mSLR1s</i> with <i>Sma</i> I site                                          |
| pCAMBI.pAct-3XFLAG-SLR1.R                                                                                                                                                                                                            | GACTAGTTCACGCCGCGCGCAGCGCC      | 3' primer amplifying <i>SLR1</i> or <i>mSLR1s</i> with <i>Spe</i> I site                                          |
| <b>Production of recombinant SLR1, GID1, GID2, and OsSklp15 protein for in vitro pull down experiments</b>                                                                                                                           |                                 |                                                                                                                   |
| pGEX4T.SLR1.F                                                                                                                                                                                                                        | GGAATTCATGAAGCGCAGTACCAAGA      | 5' primer amplifying <i>SLR1</i> with <i>Eco</i> RI site                                                          |
| pGEX4T.SLR1.R                                                                                                                                                                                                                        | GGAATTCACGCGCGCGCAGCGCC         | 3' primer amplifying <i>SLR1</i> with <i>Eco</i> RI site                                                          |
| pET52b.cMyc-GID1.F                                                                                                                                                                                                                   | GGGGTACCAAAATGGAGGAGCAGAAGCTG   | 5' primer amplifying <i>cMyc-GID1</i> with <i>Kpn</i> I site                                                      |
| pET52b.cMyc-GID1.R                                                                                                                                                                                                                   | CGGGATCCTTGTAGTAGAGGTTAGCGTT    | 3' primer amplifying <i>cMyc-GID1</i> with <i>Bam</i> HI site                                                     |
| pGEX SLR1- rbs+cMyc-GID1.F                                                                                                                                                                                                           | GCCGATATCCCTCTAGAAATAATTTT      | 5' primer amplifying <i>rbs+cMyc-GID1</i> with <i>Eco</i> RV site                                                 |
| pGEX SLR1- rbs+cMyc-GID1.R                                                                                                                                                                                                           | GGCGATATCTTAGTGGTGTGATGGTGA     | 3' primer amplifying <i>rbs+cMyc-GID1</i> with <i>Eco</i> RV site                                                 |
| pET3d-OsSklp15.F                                                                                                                                                                                                                     | CGGGATCCATGGCGCTGAGGAGAGAA      | 5' primer amplifying <i>OsSklp15</i> with <i>Bam</i> HI site                                                      |
| pET3d-OsSklp15.R                                                                                                                                                                                                                     | CGGGATCCCTACTCAAAGCCACTGGT      | 3' primer amplifying <i>OsSklp15</i> with <i>Bam</i> HI site                                                      |
| pGEX rbs-OsSklp15.F                                                                                                                                                                                                                  | CCGCTCGAGCGGTTTCCCTCTAGAAATAA   | 5' primer amplifying <i>rbs+OsSklp15</i> with <i>Xho</i> I site                                                   |
| pGEX rbs-OsSklp15.R                                                                                                                                                                                                                  | CCGCTCGAGCTACTCAAAGCCACTGGT     | 3' primer amplifying <i>rbs+OsSklp15</i> with <i>Xho</i> I site                                                   |
| pGEX 3HA-GID2+rbs-OsSklp15.F                                                                                                                                                                                                         | GGAATTCATGAAGTTCCTGCTGATTC      | 5' primer amplifying <i>3HA-GID2</i> with <i>Eco</i> RI site                                                      |
| pGEX 3HA-GID2+rbs-OsSklp15.R                                                                                                                                                                                                         | TCCCCCGGGCTACCCGATTGGCCCCCTC    | 3' primer amplifying <i>3HA-GID2</i> with <i>Sma</i> I site                                                       |
| pET15b 3HA-GID2+rbs-OsSklp15.F                                                                                                                                                                                                       | GCCGATATCGAATTCATGGATACCCAT     | 3' primer amplifying <i>3HA-GID2+rbs-OsSklp15</i> with <i>Eco</i> RV site                                         |
| pET15b 3HA-GID2+rbs-OsSklp15.R                                                                                                                                                                                                       | GGCGATATCTCGAGGATCCCTACTCAA     | 3' primer amplifying <i>3HA-GID2+rbs-OsSklp15</i> with <i>Eco</i> RV site                                         |
| <b>Construction for BiFc</b>                                                                                                                                                                                                         |                                 |                                                                                                                   |
| pBI101.GID1.F                                                                                                                                                                                                                        | TCCCCCGGGATGGCCGGCAGCGACGAGGT   | 5' primer amplifying <i>GID1</i> with <i>Sma</i> I site                                                           |
| pBI101.GID1.R                                                                                                                                                                                                                        | CGAGCTCCTAGTAGTAGAGGTTAGCGT     | 3' primer amplifying <i>GID1</i> with <i>Sac</i> I site                                                           |
| <b>Constructions for GID2 alanine scanning</b>                                                                                                                                                                                       |                                 |                                                                                                                   |
| KFR2AAA.GID2.F                                                                                                                                                                                                                       | CCGAATTCATGGCAGCAGCATCTGATTCGT  |                                                                                                                   |
| KFR2AAA.GID2.R                                                                                                                                                                                                                       | ACGAATCAGATGCTGCTGCCATGAATTCGG  |                                                                                                                   |
| KR30AA.GID2.F                                                                                                                                                                                                                        | GACGAGCCGGCCGGCCAGCGGACCGAT     |                                                                                                                   |
| KR30AA.GID2.R                                                                                                                                                                                                                        | ATCGGTCCGCTGGGCGCGCCGGCTCGTC    |                                                                                                                   |
| SSS39AAA.GID2.F                                                                                                                                                                                                                      | ATCCGTCCTCCGCGCCGCCAGGGCGAGG    |                                                                                                                   |
| SSS39AAA.GID2.R                                                                                                                                                                                                                      | CCTCGCCCTGGGCGCGCGGAGGACGGAT    |                                                                                                                   |
| SSQ48AAA.GID2.F                                                                                                                                                                                                                      | AGGCCCTCCTGCGCGCAGCCGCCACCGC    |                                                                                                                   |
| SSQ48AAA.GID2.R                                                                                                                                                                                                                      | GCGGTGGCGGGCTGCGGCAGAGGAGGCCT   |                                                                                                                   |
| EEQ58AAA.GID2.F                                                                                                                                                                                                                      | AGCAGCAGCAGCCGCGAGCCCTCCGAGG    |                                                                                                                   |
| EEQ58AAA.GID2.R                                                                                                                                                                                                                      | CCTCCGGAGGGGCTGCGGCCCTGCTGCTGCT |                                                                                                                   |
| EQP69AAA.GID2.F                                                                                                                                                                                                                      | CGGGAGAGGGCGCGCAGCCAGGTTCCGG    |                                                                                                                   |
| EQP69AAA.GID2.R                                                                                                                                                                                                                      | CCGGAACCCTGGCTGCGGCCCTCTCCCG    |                                                                                                                   |
| L76A.GID2.F                                                                                                                                                                                                                          | CGAGGGTTCGGATGCGGGGAGGACCTGG    |                                                                                                                   |
| L76A.GID2.R                                                                                                                                                                                                                          | CCAGGTCCTCCCGGATCCGGAACCCTCG    |                                                                                                                   |
| L80A.GID2.F                                                                                                                                                                                                                          | ATCTCGGGGAGGACCGCTGTTCGAGGTGC   |                                                                                                                   |
| L80A.GID2.R                                                                                                                                                                                                                          | GCACCTCGAACACGGCGTCTCCCGAGAT    |                                                                                                                   |
| V81A.GID2.F                                                                                                                                                                                                                          | TCGGGGAGGACCTGGCCTTCGAGGTGCTGC  |                                                                                                                   |
| V81A.GID2.R                                                                                                                                                                                                                          | CGAGCACCTCGAAGGCCAGGTCTCCCGCA   |                                                                                                                   |
| L85A.GID2.F                                                                                                                                                                                                                          | TGGTGTTCGAGGTGGCCCGCGAGCGGAGG   |                                                                                                                   |

|                  |                                |
|------------------|--------------------------------|
| L85A.GID2.R      | CCTCCGCTCGCCGGCCACCTCGAACACCA  |
| R87A.GID2.F      | TCGAGGTGCTGCGGGCAGCGGAGGCGCGGA |
| R87A.GID2.R      | TCCGCGCCTCCGCTGCCCGCAGCACCTCGA |
| R91A.GID2.F      | GGCGAGCGGAGGCGGCCACGCTGGCGGCCG |
| R91A.GID2.R      | CGGCCGCCAGCGTGCCCGCCTCCGCTCGCC |
| L93A.GID2.F      | CGGAGGCGGGACGGCCCGGCCCGCGCGCT  |
| L93A.GID2.R      | ACGCCCGGCCCGCGGCCCTCCGCGCCTCCG |
| C98A.GID2.F      | TGGCGGCCCGCGGCCGTGAGCAGGGGGT   |
| C98A.GID2.R      | ACCCCTGCTCACGGCCCGGCCCGGCCCA   |
| V99A.GID2.F      | CGGCCCGGCCGTGCGCCAGCAGGGGGTGGC |
| V99A.GID2.R      | GCCACCCCTGCTGGCGCACGCCCGGCCG   |
| R101A.GID2.F     | CGGGTGGCGTGAGCGCCGGGTGGCGGCAGC |
| R101A.GID2.R     | GCTGCCGCCACCCGGCGCTCACGCACGCCG |
| W103A.GID2.F     | GCGTGAGCAGGGGGCCCGGCAGCTCGCGG  |
| W103A.GID2.R     | CCGCGAGCTGCCGGGCCCCCTGCTCACGC  |
| L106A.GID2.F     | GGGGTGGCGGCAGGCCCGGAGGACGAGC   |
| L106A.GID2.R     | GCTCGTCTCCGCGCCTGCCGCCACCCCC   |
| D109A.GID2.F     | GGCAGCTCGCGGAGGCCGAGCGCTCTGGG  |
| D109A.GID2.R     | CCCAGAGCCGCTCGGCCTCCGCGAGCTGCC |
| E110A.GID2.F     | AGCTCGCGGAGGACGCCCGGCTCTGGGAGG |
| E110A.GID2.R     | CCTCCAGAGCCGGCGTCTCCGCGAGCT    |
| W113A.GID2.F     | AGGACGAGCGGCTCGCCGAGGCCGCGTGGC |
| W113A.GID2.R     | CGCACGCGGCCCTCGGCAGCCGCTCGTCT  |
| E114A.GID2.F     | ACGAGCGGCTCTGGGCGCGCGTGCCTGC   |
| E114A.GID2.R     | GCACGCACGCGCGGCCAGAGCCGCTCGT   |
| C117A.GID2.F     | TCTGGGAGGCCCGGCCGTGCGGGAGTGGG  |
| C117A.GID2.R     | CCCACTCCCGCACGGCCGCGCCTCCAGA   |
| W121A.GID2.F     | CGTGCGTGCGGGAGGCCCGAACCTCGGCT  |
| W121A.GID2.R     | AGCCGAGGTTCCGCGCCTCCCGCACGCACG |
| N123A.GID2.F     | TGCGGGAGTGGGCGGCCCTCGGCTTCTCCG |
| N123A.GID2.R     | CGGAGAAGCCGAGGGCCCGCACTCCCGCA  |
| E128A.GID2.F     | ACCTCGGCTTCTCCGCCCGCAGCTCCGGG  |
| E128A.GID2.R     | CCCGGAGCTGCCGGGCGGAGAAGCCGAGGT |
| L131A.GID2.F     | TCTCCGAGCGGCAGGCCCGGGCGGTGTC   |
| L131A.GID2.R     | GCACCACGGCCCGGCCCTGCCCTCGGAGA  |
| R132A.GID2.F     | CCGAGCGGCAGCTCGCCGCGGTGGTGTCT  |
| R132A.GID2.R     | AGAGCACACGGCGCGAGCTGCCGCTCGG   |
| V134A.GID2.F     | GGCAGCTCCGGGCGCCGCTGCTCTCCCTCG |
| V134A.GID2.R     | CGAGGGAGAGCACGGCGGCCCGGAGCTGCC |
| V135A.GID2.F     | AGCTCCGGGCGGTGGCCCTCTCCCTCGGTG |
| V135A.GID2.R     | CACCGAGGAGAGGGCCACGGCCCGGAGCT  |
| L136A.GID2.F     | TCCGGCCGCTGGTGGCCTCCCTCGGTGGAT |
| L136A.GID2.R     | ATCCACCGAGGAGGCCACCACGGCCCGGA  |
| L138A.GID2.F     | CCGTGGTGTCTCCGCGGTGGATTCCGCC   |
| L138A.GID2.R     | GGCGGAATCCACCGCGGAGAGCACACCGG  |
| G139A.GID2.F     | TGGTGTCTCCCTCGCCGATTCCGCCCGGC  |
| G139A.GID2.R     | GCCGGCGGAATCCGGCGAGGAGACACCA   |
| G140A.GID2.F     | TGCTCTCCCTCGGTGCCTTCCGCCGGCTCC |
| G140A.GID2.R     | GGAGCCGGCGGAAGCACCGAGGAGAGCA   |
| F141A.GID2.F     | TCTCCCTCGGTGGAGCCCGCGGCTCCACG  |
| F141A.GID2.R     | CGTGGAGCCGGCGGGCTCCACCGAGGAGGA |
| R143A.GID2.F     | TGGGTGATTCCGCGCCCTCCACGCTGTCT  |
| R143A.GID2.R     | AGACAGCGTGGAGGGCGCGGAATCCACCGA |
| L144A.GID2.F     | GTGGATTCCGCGGGCCACGCTGTCTACA   |
| L144A.GID2.R     | TGTAGACAGCGTGGGCCCGCGGAATCCAC  |
| H145A.GID2.F     | GATTCCGCGGCTCGCCGCTGTCTACATCC  |
| H145A.GID2.R     | GGATGTAGACAGCGCGGAGCCGGCGAATC  |
| V147A.GID2.F     | GCCGGCTCACGCTGCCTACATCCGCCCC   |
| V147A.GID2.R     | GGGGGCGGATGTAGGCAGCGTGGAGCCGGC |
| I149A.GID2.F     | TCCACGCTGTCTACGCCCGCCCTGCAGT   |
| I149A.GID2.R     | ACTGCAGGGGCGGGCGTAGACAGCGTGGGA |
| P151A.GID2.F     | CTGTCTACATCCGCGCCCTGCAGTGGCGTG |
| P151A.GID2.R     | CACGCCACTGCAGGGCGCGGATGTAGACAG |
| L152A.GID2.F     | TCTACATCCGCCCGCCAGTGGCGTGGCG   |
| L152A.GID2.R     | CGCCACGCCACTGGGCGGGCGGATGTAGA  |
| QWR153AAA.GID2.F | ATCCGCCCCCTGGCCCGCCCGCGCGCGCG  |
| QWR153AAA.GID2.R | CGCCGGCGCCGGCGGCCAGGGGCGGAT    |
| GAG156AAA.GID2.F | TGCAGTGGCGTGCCCGCAGCCGTGCCAGGC |
| GAG156AAA.GID2.R | GCCTGGGCACGGCTGCGGCACGCCACTGCA |
| VPR159AAA.GID2.F | GTGGCGCCGGCGCCCGCCAAACAGGGGA   |
| VPR159AAA.GID2.R | TCCCTGTTGGGCGGGCGGCCCGCGCCAC   |
| QQG162AAA.GID2.F | GCGTCCCAGGGCAGCCGCCAGGCGGCAGC  |
| QQG162AAA.GID2.R | GCTGCCGCTGGCGGCTGCCCTGGGCACGC  |
| R165A.GID2.F     | CCAGGCAACAGGGGGCCCGCAGCCGCCG   |
| R165A.GID2.R     | CCGGCGGCTGCCGGGCCCTGTTGCCTGG   |
| RQP166AAA.GID2.F | AACAGGGGAGGGCCGAGCCCGGTGAGGT   |
| RQP166AAA.GID2.R | ACCTCACCGGGGCTGCGGCCCTCCCTGTT  |
| R174A.GID2.F     | CGGTGAGGTTGGGCGCCGACAGGTTACGC  |
| R174A.GID2.R     | GCTGAACCTGGTCCGGCCCAACCTCACCG  |
| D175A.GID2.F     | TGAGGTTGGGCGGGCCAGGTTACGCTCT   |
| D175A.GID2.R     | AGAGCTGAACCTGGGCGGCCCAACCTCA   |
| V177A.GID2.F     | TGGGCGGGACAGGCCAGCTCTCGCTGT    |
| V177A.GID2.R     | ACAGCGAGAGCTGGGCGGCTCCCGCCCA   |



|                  |                                  |
|------------------|----------------------------------|
| L179A.GID2.F     | GGGACCAGTTTCAGGCCTCGCTGTCACTGT   |
| L179A.GID2.R     | ACAGTGACAGCGAGGCCTGAACCTGGTCCC   |
| S180A.GID2.F     | ACCAGGTTTCAGCTCGCCCTGCTACTGTTCT  |
| S180A.GID2.R     | AGAACAGTGACAGGGCGAGCTGAACCTGGT   |
| L181A.GID2.F     | AGGTTTCAGCTCTCGGCCTCACTGTCTCCA   |
| L181A.GID2.R     | TGGAGAACAGTGAGGCCGAGAGCTGAACCT   |
| S182A.GID2.F     | TTCAGCTCTCGCTGGCACTGTCTCCATTG    |
| S182A.GID2.R     | CAATGGAGAACAGTGCCAGCGAGAGCTGAA   |
| L183A.GID2.F     | AGCTCTCGCTGTGACCTTCTCCATTGGGT    |
| L183A.GID2.R     | ACCCAATGGAGAAGGCTGACAGCGAGAGCT   |
| S185A.GID2.F     | CGCTGTCACTGTTCCGCATTTGGGTTCTTTC  |
| S185A.GID2.R     | GAAAGAACCCTAATGGCGAACAGTGACAGCG  |
| I186A.GID2.F     | TGTCACTGTTCTCCGCCGGTTCTTTCAGA    |
| I186A.GID2.R     | TCTGAAAGAACCCTGGCGGAGAACAGTGACA  |
| F189A.GID2.F     | TCTCCATTGGGTTTCGCCAGAAATATGCCCTT |
| F189A.GID2.R     | AAGGCATATTCTGGGCGAACCCAATGGAGA   |
| QN190AA.GID2.F   | ATTGGGTTCTTTGCCGCCATGCCCTGTCTCT  |
| QN190AA.GID2.R   | AGGACAAGGCATGGCGGCAAAGAACCCTAAT  |
| 192MA.GID2.F     | GGTCTTTCAGAAATGCCCTTGTCTTAAGA    |
| 192MA.GID2.R     | TCTTAGGACAAGGGGCACTTCTGAAAGAACC  |
| PCP193AAA.GID2.F | TTCAGAATATGGCCCGCAGCCAAGAAAGACA  |
| PCP193AAA.GID2.R | TGTCCTTCTTGGCTGCGGCCATATTCTGAA   |
| DKG198AAA.GID2.F | GTCTAAGAAAGCCGCGCAATGACAGTG      |
| DKG198AAA.GID2.R | CACTGTCAATTTGCGCGGCTTCTTAGGAC    |
| SDK203AAA.GID2.F | AGGGAAATGACGCCGAGCCAATGGAGGGG    |
| SDK203AAA.GID2.R | CCCCCTCATTTGGCTGCGGCGCTATTTCCCT  |
| GGG207AAA.GID2.F | GTGATAAGAATGACGCGCCCAATGCGGGT    |
| GGG207AAA.GID2.R | ACCCGATTGGGCGGCTGCATTCTATCAC     |
| QCG210AAA.GID2.F | ATGGAGGGGGCGCAGCCGCTAGCCCGGA     |
| QCG210AAA.GID2.R | TCCCGGCTAGGCGGCTGCGCCCCCTCCAT    |

**Constructions for SLR1 alanine scanning**

|                  |                                 |
|------------------|---------------------------------|
| STY153AAA.SLR1.F | ACTCGTCGAGTGCCGCGAGCCGCCCTCAGGC |
| STY153AAA.SLR1.R | GCCTGAGGGCGGCTGCGGCACCTGACGAGT  |
| SSS190AAA.SLR1.F | GCGGCAGCACGCGCGCAGCCTCATCGTCT   |
| SSS190AAA.SLR1.R | ACGACGATGAGGCTGCGGCCGTGCTGCCG   |
| VVV229AAA.SLR1.F | CCGCCGTGCCGCGCAGCCGTTGACACGC    |
| VVV229AAA.SLR1.R | GCGTGTCAACGGCTGCGGCGGCGCAGCGCG  |
| GIR238AAA.SLR1.F | CGCAGGAGGCTGCCGAGCCCTGGTGCACG   |
| GIR238AAA.SLR1.R | CGTGCACCAGGCTGCGGCAGCCTCTGCG    |
| VQQ252AAA.SLR1.F | GCGCGGAGGCGCGCAGCCGAGAACTTCG    |
| VQQ252AAA.SLR1.R | CGAAGTCTCGGCTGCGGCGCCTCCGCGC    |
| VKQ264AAA.SLR1.F | CGGAGGCGCTGGCCGAGCCATCCCCACGC   |
| VKQ264AAA.SLR1.R | GCGTGGGGATGGCTGCGGCCAGCGCCTCCG  |
| QGG274AAA.SLR1.F | TGGCCGCTCCGCGCAGCCGATGCGCA      |
| QGG274AAA.SLR1.R | TGCGCATGGCGGCTGCGGCGGACGCGCCA   |
| YFG284AAA.SLR1.F | AGGTCGCTGCCGCGCAGCCGAGGCCCTCG   |
| YFG284AAA.SLR1.R | CGAGGGCTCGGCTGCGGCGGCGAGCAGCT   |
| RRV291AAA.SLR1.F | AGGCCCTCGCCGCGCAGCCTACCCTTCC    |
| RRV291AAA.SLR1.R | GGAAGCGGTAGGCTGCGGCGGCGAGGGCCT  |
| HFY315AAA.SLR1.F | TTCTGCACGCGCCGCGCAGCCGAGCTCTGCC |
| HFY315AAA.SLR1.R | GGCAGGACTCGGCTGCGGCGGCGTGCAGAA  |
| PYL321AAA.SLR1.F | ACGAGTCTTGGCGCGCAGCCAAGTTCCGCC  |
| PYL321AAA.SLR1.R | GGCGAACTTGGCTGCGGCGCAGGACTCGT   |
| HFT327AAA.SLR1.F | TCAAAGTTCCGCGCCGCGCCGCAATCAAG   |
| HFT327AAA.SLR1.R | CTTGATTTGCGGCGGCGGCGGCAACTTGA   |
| ILE334AAA.SLR1.F | CAAAATCAAGCCGCGCAGCCGCTTTCGCCG  |
| ILE334AAA.SLR1.R | CGGCGAAAGCGGCTGCGGCGGCTTGATTG   |
| RVH343AAA.SLR1.F | CCGGCTGCCACGCCGAGCCGCTCGTGCAGT  |
| RVH343AAA.SLR1.R | AGTCGACGACGGCTGCGGCGGCTGCGGCGG  |
| QWP356AAA.SLR1.F | AGCAGGGGATGGCCGCGCCGCTCTCTCC    |
| QWP356AAA.SLR1.R | GGAGGAGAGCGGCGGCGCCATCCCCTGCT   |
| LQ361AAA.SLR1.F  | GGCCAGCTCTCGCCGAGCCCTCGCCCTTC   |
| LQ361AAA.SLR1.R  | GAAGGGCGAGGGCTGCGGCGGAGAGCTGGCC |
| GPP370AAA.SLR1.F | TTCTGTCGCGCGCCGAGCCTCGTTCCGCC   |
| GPP370AAA.SLR1.R | GGCGGAAACGAGGCTGCGGCGCCGGGACGAA |
| RLT375AAA.F      | CCCCATCGTTCCGCCGCGCCGCGCTCGGCC  |
| RLT375AAA.R      | GGCCGACGCGCGCGGCGGCGAACGATGGGG  |
| LQQ390AAA.SLR1.F | AGACCGACGCGCCGCGCAGCCGTGGGTTGGA |
| LQQ390AAA.SLR1.R | TCCAACCCACGGCTGCGGCGGCGTCTCGTCT |
| WKL395AAA.SLR1.F | AGCAGGTGGGTGCGCGCAGCCCGCAGTTTCG |
| WKL395AAA.SLR1.R | CGAACTGGGCGGCTGCGGCGCCACCTGCT   |
| QYR409AAA.SLR1.F | GCGTGCAGTCTCGCCGAGCCGACTCGTCTG  |
| QYR409AAA.SLR1.R | CGACGAGTCCGGCTGCGGCGAAGTTCGACGC |
| DLE420AAA.SLR1.F | CCACTCTCGCGCGCAGCCCGTTTCATGC    |
| DLE420AAA.SLR1.R | GCATGAACGGGCTGCGGCGGCGAGAGTGG   |
| VNS443AAA.SLR1.F | GGTGATCGCCCGCAGCCGTTTCGAGCT     |
| VNS443AAA.SLR1.R | AGCTCGAACCGGCTGCGGCGGCGATCACC   |
| HRL450AAA.SLR1.F | GTTCGAGCTGGCCGAGCCCTCGCGCAGCC   |
| HRL450AAA.SLR1.R | GGCTGCGGAGGGCTGCGGCGGCTCGAAC    |
| EKV460AAA.SLR1.F | CCGGCGGCTGCGGCGAGCCCTGGGCGAGG   |
| EKV460AAA.SLR1.R | CCGTGCCAGGGCTGCGGCGGCGGCGGCGG   |
| EQE478AAA.SLR1.F | TCACCGTGGTAGCCGCGAGCCGCAACACAA  |

|                  |                                |
|------------------|--------------------------------|
| EQE478AAA.SLR1.R | TGTGGTTGGCGGCTGCGGCTACCACGGTGA |
| NHN482AAA.SLR1.F | AGCAGGAGGCCGCGCAGCCTCCGGCTCAT  |
| NHN482AAA.SLR1.R | ATGAGCCGGAGGCTGCGGCGGCCTCCTGCT |
| DRF490AAA.SLR1.F | GCTCATTCCTCGCCGAGCCACCGAGTCGC  |
| DRF490AAA.SLR1.R | GCGACTCGGTGGCTGCGGCGAGGAATGAGC |
| HYY497AAA.SLR1.F | CCGAGTCGCTGGCCGAGCCTCCACCATGT  |
| HYY497AAA.SLR1.R | ACATGGTGGAGGCTGCGGCCAGCGACTCGG |
| EVY533AAA.SLR1.F | AGGTCAATGTCCGCCGAGCCCTCGGCCGGC |
| EVY533AAA.SLR1.R | GCCGGCCGAGGGCTGCGGCGGACATGACCT |
| QIC539AAA.SLR1.F | CCTCGGCCGGGCCGAGCCAAACGTCTGTGC |
| QIC539AAA.SLR1.R | GCCACGACGTTGGCTGCGGCCCGGCCGAGG |
| RH554AA.SLR1.F   | GAGCGACGGAGGCCGCCGAGACGCTGGGG  |
| RH554AA.SLR1.R   | CCCCAGCGTCTCGGCGGCCTCCGTGCGCTC |
| RN562AA.SLR1.F   | CTGGGGCAGTGGGCCGCCCGCTCGGCCGC  |
| RN562AA.SLR1.R   | GCGGCCGAGGCCGGCGGCCACTGCCCCAG  |
| GF569AA.SLR1.F   | CTCGGCCGCGCGCCGCGGAGCCCGTGCAC  |
| GF569AA.SLR1.R   | GTGCACGGGCTCGGCGGGCGCGGCCGAG   |
| LF589AA.SLR1.F   | ACGCTCCTCGCGGCCGCCGCGCGGGAC    |
| LF589AA.SLR1.R   | GTCGCCCGCGCGGCCGCCGAGGAGCGT    |
| GW608AA.SLR1.F   | TGCCTCACGCTGGCCGCCACACGCGCCCG  |
| GW608AA.SLR1.R   | CGGGCGCGTGTGGGCGGCCAGCGTGAGGCA |
| RP612AA.SLR1.F   | GGCTGGCACACGGCCGCCCTCATCGCCACC |
| RP612AA.SLR1.R   | GGTGGCGATGAGGGCGGCCGTGTGCCAGCC |
| S618A.SLR1.F     | CGCTCATCGCCACCGCCGATGGCGCGTCG  |
| S618A.SLR1.R     | CGACGCGCCATGCGGCGGTGGCGATGAGCG |
| W620A.SLR1.F     | TCGCCACCTCGGCAGCCCGCTCGCCCGCG  |
| W620A.SLR1.R     | CCGCGCGACGCGGGCTGCCGAGGTGGCGA  |
| R621A.SLR1.F     | CCACCTCGGCATGGGCCGTGCGCCGCGCGT |
| R621A.SLR1.R     | ACGCCGCGGCGACGGCCCATGCCGAGGTGG |
